# Supplementary material for: Acute Care, Prescription Opioid Use, and Overdose Following Discontinuation of Long-Term Buprenorphine Treatment for Opioid Use Disorder
Source: Atypon-hosted journal article supplement (doi:10.1176/appi.ajp.2019.19060612), 2019-12-02
Supplement: appi.ajp.2019.19060612.ds001.pdf [file appi.ajp.2019.19060612.ds001.pdf]

**TABLE S1. Procedure codes used to define baseline health service use**

| Health Service                  | ICD-9 Codes                                                                        | ICD-10 Codes                  |
|---------------------------------|------------------------------------------------------------------------------------|-------------------------------|
| <b>Opioid overdose</b>          | 965.0, E850.0-E850.2                                                               | T40.0-T40.4                   |
| <b>Non-opioid drug overdose</b> | 960-964, 965.1-979, E850.3-E850.9, E851-E858, E950.0-E950.5, E962.0, E980.0-E980.5 | T36-T39, T40.5-T40.9, T41-T50 |

ICD-9 = International Classification of Diseases, 9th Revision; ICD-10 = International Classification of Diseases, 10th Revision;

Note: Opioid use disorders and comorbid conditions were coded using the International Classification of Diseases, applying clinical codes from the Ninth Revision (ICD-9) to all claims preceding October 15th, 2015 and codes from the Tenth Revision (ICD-10) to all subsequent claims.

**TABLE S2. Diagnosis codes used to define baseline psychiatric comorbidities**

| Comorbid Condition                   | ICD-9 Codes                                             | ICD-10 Codes     |
|--------------------------------------|---------------------------------------------------------|------------------|
| <b>Mental health disorders</b>       | 290, 293-302, 306-319                                   | F01-F09, F20-F99 |
| <b>Alcohol use disorders</b>         | 291, 303, 305.0                                         | F10              |
| <b>Non-opioid drug use disorders</b> | 292, 304.1-304.6, 304.8-304.9, 305.2-305.4, 305.6-305.9 | F12-F16, F18-F19 |

ICD-9 = International Classification of Diseases, 9th Revision (ICD-9); ICD-10 = International Classification of Diseases, 10th Revision (ICD-10)

Note: Opioid use disorders and comorbid conditions were coded using the International Classification of Diseases, applying clinical codes from the Ninth Revision (ICD-9) to all claims preceding October 15th, 2015 and codes from the Tenth Revision (ICD-10) to all subsequent claims.

**TABLE S3. Sensitivity analyses among beneficiaries with a documented opioid use disorder diagnosis**

|                                  | Inpatient Hospitalization |                 | Emergency Department Visit |                 | Overdose |                 | Opioid Prescription |                 |
|----------------------------------|---------------------------|-----------------|----------------------------|-----------------|----------|-----------------|---------------------|-----------------|
|                                  | OR                        | 95% CI          | OR                         | 95% CI          | OR       | 95% CI          | OR                  | 95% CI          |
| <b>Episode Duration</b>          |                           |                 |                            |                 |          |                 |                     |                 |
| 6-9 months (n=3,651)             | Ref.                      |                 | Ref.                       |                 | Ref.     |                 | Ref.                |                 |
| 9-12 months (n=2,199)            | 0.85                      | (0.73, 1.00)*   | 0.93                       | (0.84, 1.04)    | 1.05     | (0.83, 1.33)    | 0.97                | (0.86, 1.10)    |
| 12-15 months (n=1,351)           | 0.87                      | (0.73, 1.05)    | 0.85                       | (0.75, 0.97)*   | 1.12     | (0.86, 1.47)    | 0.85                | (0.73, 0.98)*   |
| 15-18 months (n=876)             | 0.79                      | (0.63, 0.99)*   | 0.74                       | (0.64, 0.86)*** | 1.03     | (0.75, 1.43)    | 0.68                | (0.56, 0.82)*** |
| <b>Demographics</b>              |                           |                 |                            |                 |          |                 |                     |                 |
| <b>Sex</b>                       |                           |                 |                            |                 |          |                 |                     |                 |
| Male                             | Ref.                      |                 | Ref.                       |                 | Ref.     |                 | Ref.                |                 |
| Female                           | 1.09                      | (0.95, 1.25)    | 1.17                       | (1.06, 1.28)**  | 0.64     | (0.53, 0.78)*** | 1.42                | (1.27, 1.59)*** |
| <b>Age</b>                       |                           |                 |                            |                 |          |                 |                     |                 |
| 18-24                            | Ref.                      |                 | Ref.                       |                 | Ref.     |                 | Ref.                |                 |
| 25-34                            | 0.96                      | (0.77, 1.19)    | 0.98                       | (0.85, 1.14)    | 0.89     | (0.64, 1.23)    | 1.19                | (0.99, 1.43)    |
| 35-44                            | 0.93                      | (0.73, 1.18)    | 1.02                       | (0.87, 1.20)    | 0.99     | (0.70, 1.40)    | 1.50                | (1.23, 1.82)*** |
| 45-54                            | 1.44                      | (1.09, 1.89)*   | 1.05                       | (0.86, 1.28)    | 0.82     | (0.53, 1.27)    | 2.10                | (1.67, 2.64)*** |
| 55-64                            | 1.79                      | (1.26, 2.56)**  | 1.48                       | (1.12, 1.96)**  | 1.02     | (0.59, 1.79)    | 2.69                | (1.99, 3.65)*** |
| <b>Race/ethnicity</b>            |                           |                 |                            |                 |          |                 |                     |                 |
| White                            | Ref.                      |                 | Ref.                       |                 | Ref.     |                 | Ref.                |                 |
| Non-white                        | 1.25                      | (1.01, 1.55)*   | 1.40                       | (1.20, 1.65)*** | 1.03     | (0.74, 1.45)    | 1.09                | (0.91, 1.30)    |
| <b>Medicaid Plan</b>             |                           |                 |                            |                 |          |                 |                     |                 |
| FFS                              | Ref.                      |                 | Ref.                       |                 | Ref.     |                 | Ref.                |                 |
| Capitation                       | 1.22                      | (1.05, 1.41)**  | 1.10                       | (1.00, 1.20)    | 1.25     | (1.00, 1.56)    | 1.04                | (0.93, 1.17)    |
| <b>Clinical Characteristics</b>  |                           |                 |                            |                 |          |                 |                     |                 |
| <b>Mental Health Diagnosis</b>   | 1.53                      | (1.34, 1.75)*** | 1.46                       | (1.32, 1.61)*** | 1.56     | (1.28, 1.91)*** | 1.53                | (1.37, 1.71)*** |
| <b>Substance Use Diagnoses</b>   |                           |                 |                            |                 |          |                 |                     |                 |
| Alcohol use disorder             | 1.56                      | (1.22, 1.99)*** | 1.29                       | (1.06, 1.58)*   | 1.94     | (1.41, 2.67)*** | 1.00                | (0.79, 1.25)    |
| Non-opioid drug use disorder     | 1.61                      | (1.40, 1.86)*** | 1.21                       | (1.09, 1.35)*** | 1.42     | (1.15, 1.75)**  | 1.07                | (0.95, 1.21)    |
| <b>Treatment Characteristics</b> |                           |                 |                            |                 |          |                 |                     |                 |
| Initial buprenorphine dose       | 0.99                      | (0.96, 1.01)    | 0.98                       | (0.97, 1.00)    | 1.00     | (0.96, 1.04)    | 0.99                | (0.97, 1.02)    |

Data from 2013-2017 Multistate MarketScan.

\*p<.05; \*\*p<.01; and \*\*\*p<.001; OR= odds ratio; CI = confidence interval
