# Supplementary material for: Acute Care, Prescription Opioid Use, and Overdose Following Discontinuation of Long-Term Buprenorphine Treatment for Opioid Use Disorder
Source: Atypon-hosted journal article supplement (doi:10.1176/appi.ajp.2019.19060612), 2019-12-02
Supplement: appi.ajp.2019.19060612.ds001.pdf [file appi.ajp.2019.19060612.ds001.pdf]

 


Psychiatry Online
